# Supplementary material
Source: Springer Nature journal article supplement (https://www.springermedizin.de/resource/supplementary/12884_2012_702_MOESM6_ESM.pdf/9458512)
Supplement: MOESM6 [file 9458512]

**Table 3. Memory of childbirth as "worse than expected" in primiparous women aged 32-37 and ≥38 years compared with the reference group aged 25-31 years, in relation to mode of delivery.** Regression analyses presented as Adjusted Odds Ratio (OR) with 95 % Confidence Intervals (CI).

| <b>Maternal age, yrs</b>             | <b>n</b> | <b>%</b> | <b>Adjusted OR*</b> | <b>95% CI</b> |
|--------------------------------------|----------|----------|---------------------|---------------|
| <b>Spontaneous vaginal birth</b>     |          |          |                     |               |
| 25-31 years                          | 2342     | 16.1     | 1.00                |               |
| 32-37 years                          | 831      | 17.7     | 1.12                | 1.03-1.23     |
| ≥38 years                            | 82       | 16.7     | 1.08                | 0.84-1.39     |
| <b>Instrumental vaginal delivery</b> |          |          |                     |               |
| 25-31 years                          | 1602     | 45.3     | 3.41                | 3.13-3.70     |
| 32-37 years                          | 639      | 43.3     | 3.14                | 2.79-3.52     |
| ≥38 years                            | 83       | 43.2     | 3.03                | 2.25-4.08     |
| <b>Emergency cesarean delivery</b>   |          |          |                     |               |
| 25-31 years                          | 1135     | 55.1     | 4.89                | 4.42-5.41     |
| 32-37 years                          | 519      | 51.4     | 4.29                | 3.74-4.92     |
| ≥38 years                            | 84       | 45.7     | 3.75                | 2.75-5.13     |
| <b>Elective cesarean delivery</b>    |          |          |                     |               |
| 25-31 years                          | 66       | 9.9      | 0.48                | 0.37-0.63     |
| 32-37 years                          | 37       | 8.6      | 0.44                | 0.31-0.62     |
| ≥38 years                            | 7        | 7        | 0.34                | 0.15-0.74     |

\* Adjusted for smoking, single status, native language other than Norwegian and education
